# Supplementary material for: Deep Vein Thrombosis Is Facilitated by Endothelial-Derived Extracellular Vesicles via the PDI–GRP94–GPIIb/IIIa Pathway in Mice
Source: MDPI journal article supplement (doi:10.3390/jcm12134265), 2023-06-26
Supplement: s1 [file s1]

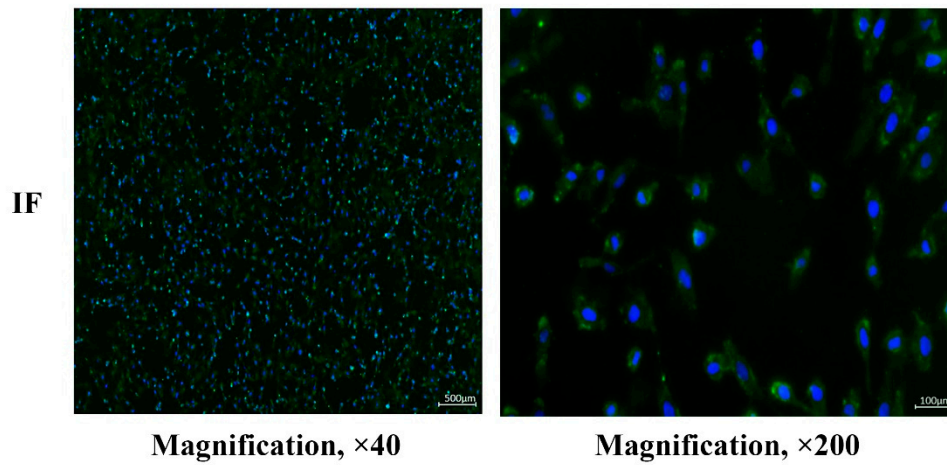

**Supplementary Figure S1.** Identification of HUVECs. CD31 IF staining was performed on HUVECs, which was subjected to Inverted fluorescence microscope. IF, immunofluorescent. HUVECs, human umbilical vein endothelial cells.

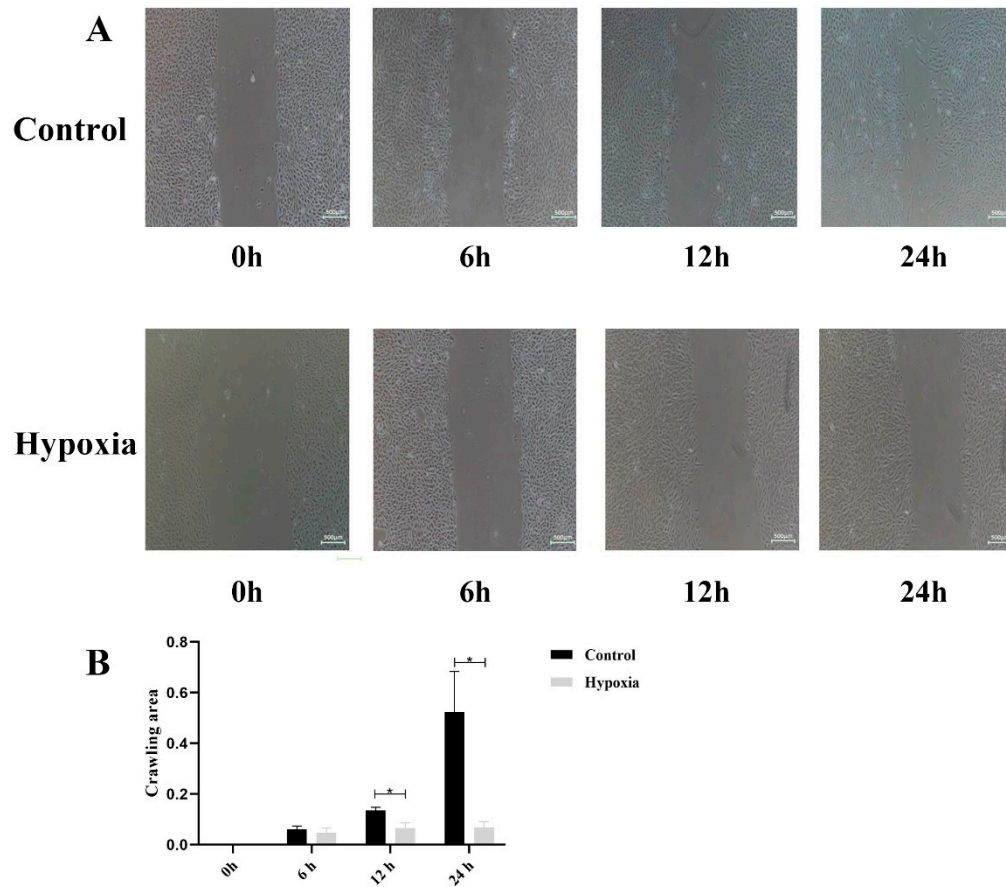

**Supplementary Figure S2.** Migration assay of HUVECs. **A** A scratch was created in the cell monolayer, the crawling area was captured 0 hours, 6 hours, 12 hours, and 24 hours after the scratch was made. **B** The crawling area was compared between the control group and the hypoxia group at consecutive time points.

\*  $p < 0.05$ . HUVECs, human umbilical vein endothelial cells.

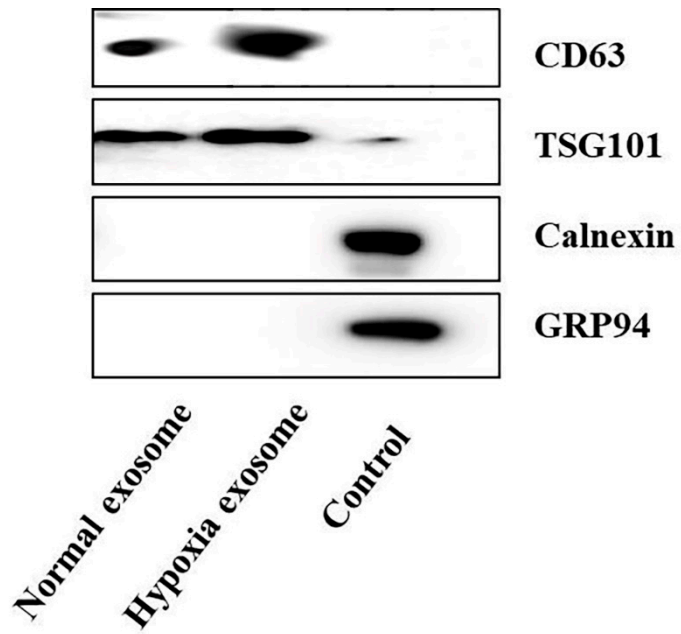

**Supplementary Figure S3.** Identification of epithelial cell-derived EVs. CD63 and TSG101 are positive indicators for exosome; Calnexin and GRP94 are negative indicators for exosomes. EVs, extracellular vesicles.

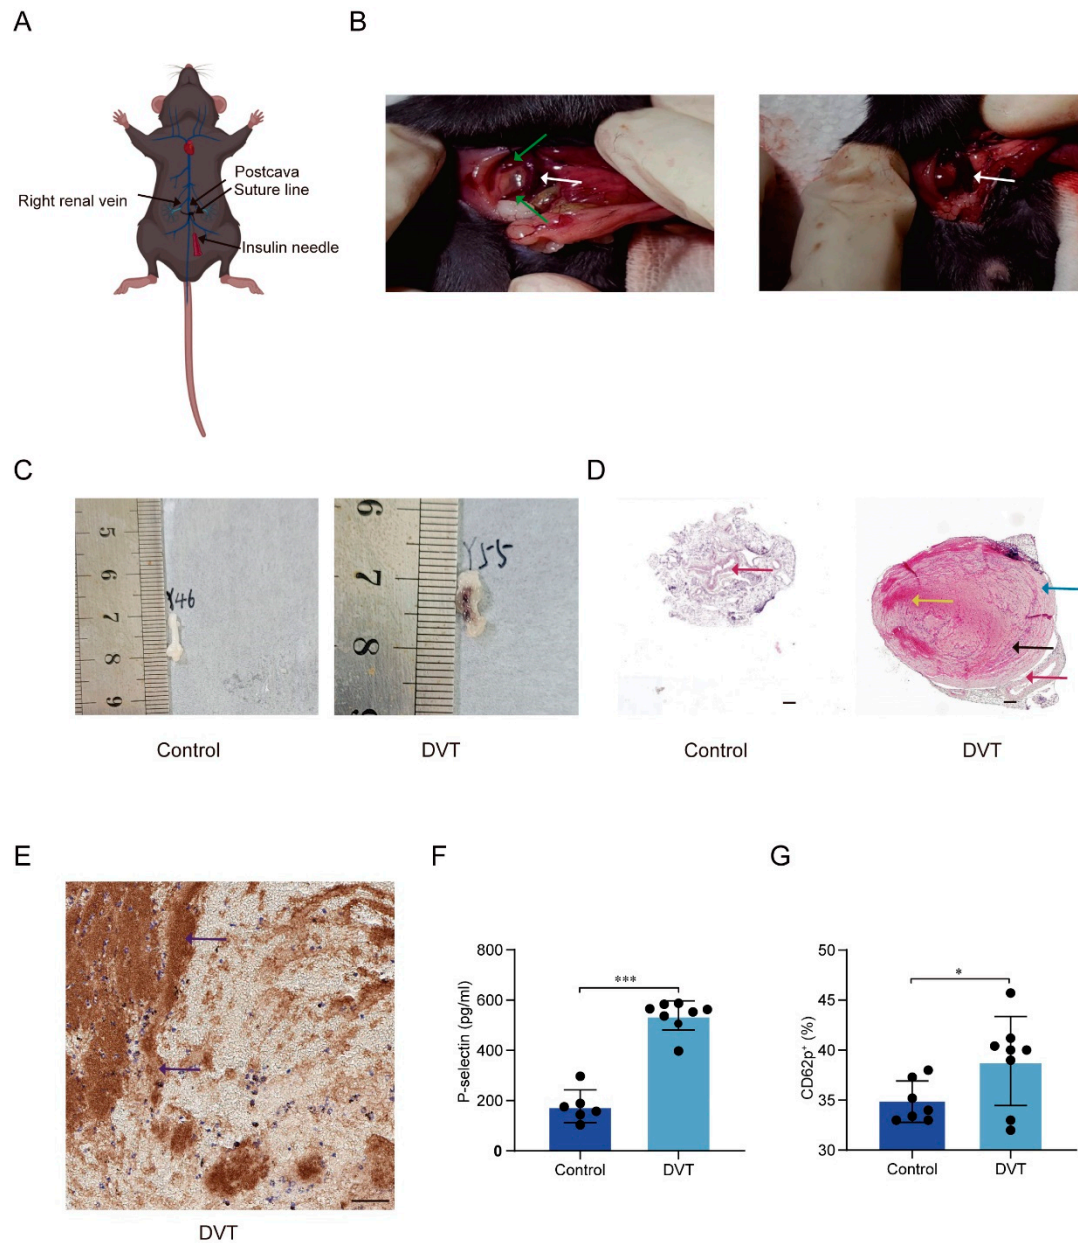

**Supplementary Figure S4.** A DVT mouse model establishment and GRP94 immunostaining for thrombus surface. **A.** Scheme of DVT operation. **B.** Right renal vein (indicated by green arrow), inferior vena cava (indicated by white arrow), and branches. After ligation of inferior vena cava and branches the inferior vena cava is filled. **C.** Morphological thrombus comparison between control group and DVT group. In DVT group, the thrombus has adhered to the vascular wall, the color of thrombus was black and textural hardness is hard than control group. **D.** HE staining of thrombus was not anything was found in inferior vena cava (indicated by pink arrow) of control group, but in DVT group, it is firmly attached to inferior vena cava (indicated by pink arrow), white blood cells in DVT (indicated by black arrow), red blood cells have no nucleus (indicated by yellow arrow), platelets and fibrinogen (indicated by blue arrow). Scale bar = 100  $\mu$ m. **E.** Platelet was detected by IHC (indicated by purple arrow). Scale bar = 50  $\mu$ m. **F.** Detection of

plasma P-selectin in mice by ELISA. **G.** Detection of CD62p on platelet surface in mice by FCM. \* $P < 0.05$ ,  
\*\*\* $P < 0.001$ .

A

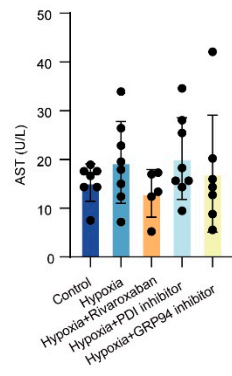

B

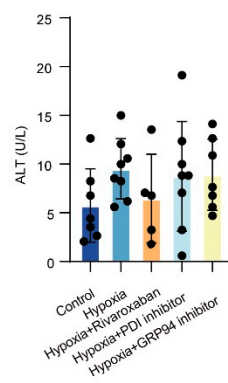

C

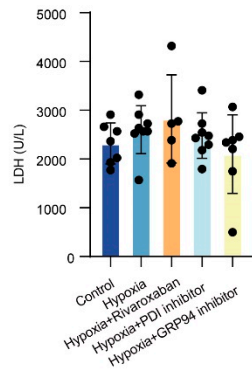

D

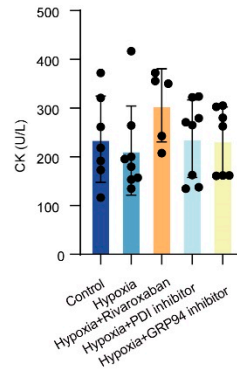

E

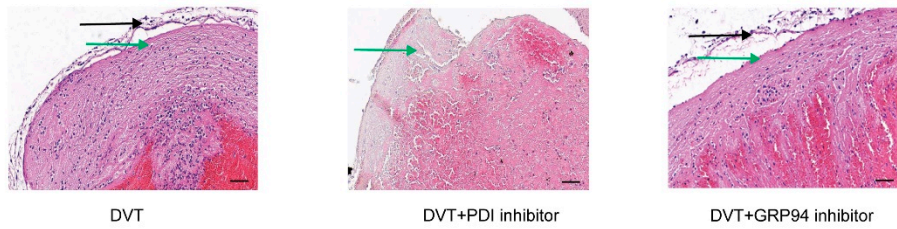

F

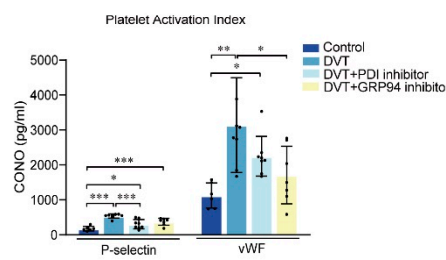

G

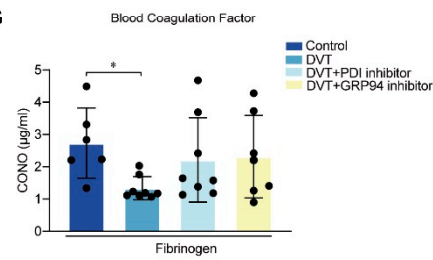

H

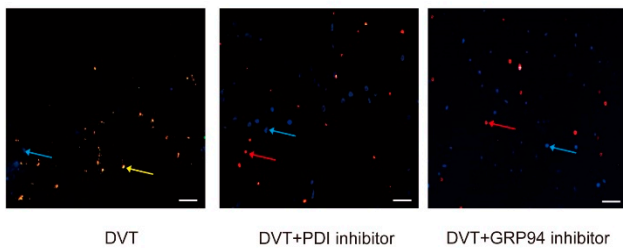

I

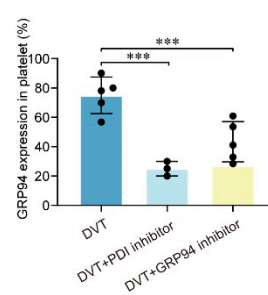

**Supplementary Figure S5.** PDI inhibitor and GRP94 inhibitor drug toxicity and platelet activation levels in DVT mouse were detected. **(A and B)** AST and ALT level were no significant change between the groups ( $P > 0.05$ ). **(C and D)** LDH and CK level were no significant change between the groups ( $P > 0.05$ ). **E.** Representative microscope image display of the HE staining of a thrombus (indicated by green arrow) and the vessel wall (indicated by black arrow). Scale bar = 20  $\mu\text{m}$ . **F.** Detection of plasma P-selectin and vWF in mice by ELISA. **G.** Detection of plasma fibrinogen in mice by ELISA. **H.** Representative fluorescent microscope images display thrombus of mice by IF staining of GRP94 (green fluorescence) and GPIIb/IIIa-labeled platelets (red fluorescence, indicated by red arrow), the color of fluorescence (indicated by yellow arrow) is orange after merging green and red fluorescence. The sections were also stained with DAPI to show nuclei (blue fluorescence, indicated by a blue arrow). Scale bar = 20  $\mu\text{m}$ . **I.** Quantitative analyses of GRP94 expression in GPIIb/IIIa-labeled platelets on thrombus.  $*P < 0.05$ ,  $**P < 0.01$ ,  $***P < 0.001$ .

**Supplementary Table S1:** primer information

| Primers ID                       | Seq (5'→3')                                                 |
|----------------------------------|-------------------------------------------------------------|
| Forward primer-ITGA2B (70711-1)  | GTTTAAACGGGCCCTCTAGACGCCACCATGGCCAGAGCTT<br>TGTGTCCACTGCAAG |
| Reverse primer- ITGA2B (70711-1) | CAGCGGTTTAACTATCTAGATCACTCCCCCTCTTCATCATC<br>TTCTTC         |
| Forward primer-ITGB3 (70708-1)   | TTGGTACCGAGCTCGGATCCCGCCACCATGCGAGCGCGGC<br>CGCGGCCCCGGCCG  |
| Reverse primer-ITGB3 (70708-1)   | ACGGGCCCTCTAGACTCGAGTTAAGTGCCCCGGTACGTGA<br>TATTGGTG        |

**ITGB3 sequencing:**

TAAGTAGAGAACCCACTGCTTACTGGCTTATCGAAATTAATACGACTCACTATAGGGAGACCCA  
AGCTGGCTAGCGTTTAACTTAAGCTTGGTACCGAGCTCGGATCCCGCCACCATGCGAGCGCGG  
CCGCGGCCCCGGCCGCTCTGGGCGACTGTGCTGGCGCTGGGGGCGCTGGCGGGCGTTGGCGTA  
GGAATGGTGAGCAAGGGCGAGGAGGATAACATGGCCATCATCAAGGAGTTCATGCGCTTCAAG

GTGCACATGGAGGGCTCCGTGAACGGCCACGAGTTCGAGATCGAGGGCGAGGGCGAGGGCCG  
CCCCTACGAGGGCACCCAGACCGCCAAGCTGAAGGTGACCAAGGGTGGCCCCCTGCCCTTCGC  
CTGGGACATCCTGTCCCCCTCAGTTCATGTACGGCTCCAAGGCCTACGTGAAGCACCCCGCCGAC  
ATCCCCGACTACTTGAAGCTGTCCTTCCCCGAGGGCTTCAAGTGGGAGCGCGTGATGAACTTCG  
AGGACGGCGGCGTGGTGACCGTGACCCAGGACTCCTCCCTGCAGGACGGCGAGTTCATCTACA  
AGGTGAAGCTGCGCGGCACCAACTTCCCCTCCGACGGCCCCGTAATGCAGAAGAAGACCATGG  
GCTGGGAGGCCTCCTCCGAGCGGATGTACCCCGAGGACGGCGCCCTGAAGGGCGAGATCAAGC  
AGAGGCTGAAGCTGAAGGACGGCGGCCACTACGACGCTGAGGTCAAGACCACCTACAAGGCC  
AAGAAGCCCGTGACGCTGCCCCGGCGCCTACAACGTCAACATCAAGTTGGACATCACCTCCCAC  
AACGAGGACTACACCATCGTGGAACAGTACGAACGCGCCGAGGGCCGCCACTCCACCGGCGG  
CATGGACGAGCTGTACAAGGGAGGTGGAGGATCAGGGGGTGGGGGATCCGGCGGTGGCGGAT  
CTGGGCCCAACATCTGTACCACGCGAGGTGTGAGCTCCTGCCAGCAGTGCCTGGCTGTGAGCCC  
CATGTGTGCCTGGTGCTCTGATGAGGCCCTGCCTCTGGGCTCACCTCGCTGTGACCTGAAGGAG  
AATCTGCTGAAGGATAACTGTGCCCCAGAATCCATCGAGTTCAGTGAGTGAGGCCCCGAGTA  
CTAGAGGACAGGCCCCTCAGCGACAAGGGCTCTGGAGACAGCTCCCAGGTCACCTCAAGTCAGT  
CCCCAGAGGATTGCACTCCGGCTCCGGCCAGATGATTGGAAGAATTTCTCCATCCAAGTGCGGC  
AGGTGGAGGATTACCCTGTGGACATCTACTACTTGATGGACCTGTCTTACTCCATGAAGGATGA  
TCTGTGGAGCATCCAGAACCTGGGTACCAAGCTGGCCACCCAGATGCGAAAGCTCACCAGTAA  
CCTGCGGATTGGCTTCGGGGCATTGTGGACAAGCCTGTGTACCATAACATGTATATCTCCCCAC  
CAGAGGCCCTCGAAAACCCCTGCTATGATATGAAGACCACCTGCTTGCCCATGTTTGGCTACAA  
ACACGTGCTGACGCTAACTGACCAGGTGACCCGCTTCAATGAGGAAGTGAAGAAGCAGAGTGT  
GTCACGGAACCGAGATGCCCCAGAGGGTGGCTTTGATGCCATCATGCAGGCTACAGTCTGTGAT  
GAAAAGATTGGCTGGAGGAATGATGCATCCCACTTGCTGGTGTTTACCACTGATGCCAAGACTC  
ATATAGCATTGGACGGAAGGCTGGCAGGCATTGTCCAGCCTAATGACGGGCAGTGTGATGTTG  
GTAGTGACAATCATTACTCTGCCTCCACTACCATGGATTATCCCTCTTTGGGGCTGATGACTGAG  
AAGCTATCCCAGAAAAACATCAATTTGATCTTTGCAGTGACTGAAAATGTAGTCAATCTCTATC  
AGAACTATAGTGAGCTCATCCAGGGACCACAGTTGGGGTTCTGTCCATGGATTCCAGCAATGT  
CCTCCAGCTCATTGTTGATGCTTATGGGAAAATCCGTTCTAAAGTAGAGCTGGAAGTGCCTGAC  
CTCCCTGAAGAGTTGTCTCTATCCTTCAATGCCACCTGCCTCAACAATGAGGTCATCCCTGGCCT  
CAAGTCTTGATGGGACTCAAGATTGGAGACACGGTGAGCTTCAGCATTGAGGCCAAGGTGCG



AGGCTGTCCCCAGGAGAAGGAGAAGTCCTTTACCATAAAGCCCGTGGGCTTCAAGGACAGCCT  
GATCGTCCAGGTCACCTTTGATTGTGACTGTGCCTGCCAGGCCCAAGCTGAACCTAATAGCCAT  
CGCTGCAACAATGGCAATGGGACCTTTGAGTGTGGGGTATGCCGTTGTGGGCCTGGCTGGCTGG  
GATCCCAGTGTGAGTGCTCAGAGGAGGACTATCGCCCTTCCCAGCAGGACGAATGCAGCCCCC  
GGGAGGGTCAGCCCGTCTGCAGCCAGCGGGGCGAGTGCCTCTGTGGTCAATGTGTCTGCCACA  
GCAGTGACTTTGGCAAGATCACGGGCAAGTACTGCGAGTGTGACGACTTCTCCTGTGTCCGCTA  
CAAGGGGGAGATGTGCTCAGGCCATGGCCAGTGCAGCTGTGGGGACTGCCTGTGTGACTCCGA  
CTGGACCGGCTACTACTGCAACTGTACCACGCGTACTGACACCTGCATGTCCAGCAATGGGCTG  
CTGTGCAGCGGCCGCGGCAAGTGTGAATGTGGCAGCTGTGTCTGTATCCAGCCGGGCTCCTATG  
GGGACACCTGTGAGAAGTGCCCCACCTGCCCAGATGCCTGCACCTTTAAGAAAGAATGTGTGG  
AGTGTAAGAAGTTTGACCGGGGAGCCCTACATGACGAAAATACCTGCAACCGTTACTGCCGTG  
ACGAGATTGAGTCAGTGAAAGAGCTTAAGGACACTGGCAAGGATGCAGTGAATTGTACCTATA  
AGAATGAGGATGACTGTGTCGTCAGATTCCAGTACTATGAAGATTCTAGTGGAAGTCCATCCT  
GTATGTGGTAGAAGAGCCAGAGTGTCCCAAGGGCCCTGACATCCTGGTGGTCCTGCTCTCAGTG  
ATGGGGGCCATTCTGCTCATTGGCCTTGCCGCCCTGCTCATCTGGAAACTCCTCATCACCATCCA  
CGACCGAAAAGAATTGCTAAATTTGAGGAAGAACGCGCCAGAGCAAAATGGGACACAGCCA  
ACAACCCACTGTATAAAGAGGCCACGTCTACCTTCACCAATATCACGTACCGGGGCACTTA  
CGAGTCTAGAGGGCCCGTTTAAACCCGCTGATCAGCCTCGACTGTGCCTTCTAGTTGCCAGCCA  
TCTGTTGTTTGCCCCCTCCCCGTCCTTCCTTGACCCTGGAAGGTGCCACTCCCCTGTCTTTCC  
TAATAAAATGAGGAAATTGCATCGCATTGTCTGAGTAGGTGTCATTCTATTCTGGGGGGTGGGG  
TGGGGCAGGACAGCAAGGGGGAGGATTGGGAAGACAATAGCAGGC

ITGA2B sequencing:

TTTGTTAGACGAAGCTTGGGCTGCAGGTCGACTCTAGAGGATCCCCGGGTACCGGTGCGCACCA  
TGGCGGAGCCGAGCGGCTCGCCCGTGACGTCCAGCTTCCCCAGCAGGCGGCCCCGGTGACAG  
CGGCGGCGGCGGCGGCCCCGGCGGCGCGACAGCAGCGCGGCCCCGGCAGCTCCCGCGGCC  
CCGGCCCCGGCCCCGGCCCCGGCGGCACAGGCTGTGCGGTGGCCCATCTGCAGGGACGCGTAC  
GAGCTGCAGGAGGTTATCGGCAGTGGAGCTACTGCTGTGGTTCAGGCAGCCCTATGCAAACCC  
AGGCAAGAACGTGTAGCAATAAAACGGATCAACTTGGAATAATGCCAGACCAGTATGGATGA  
ACTATTAAAAGAAATTCAAGCCATGAGTCAGTGCAGCCATCCCAACGTAGTGACCTATTACAC

CTCTTTTGTGGTCAAAGATGAACTTTGGCTGGTCATGAAATTACTAAGTGGAGGTTCAATGTTGG  
ATATCATAAAATACATTGTCAACCGAGGAGAACACAAGAATGGAGTTCTGGAAGAGGCAATA  
ATAGCAACAATTCTTAAAGAGGTTTTTGAAGGCTTAGACTATCTACACAGAAACGGTCAGATTC  
ACAGGGATTTGAAAGCTGGTAATATTCTTCTGGGTGAGGATGGTTCAGTACAAATAGCAGATTT  
TGGGGTAAGTGCGTTCCTAGCAACAGGGGGTGATGTTACCCGAAATAAAGTAAGAAAAACATT  
CGTTGGCACCCCATGTTGGATGGCTCCTGAAGTCATGGAACAGGTGAGAGGCTATGACTTCAAG  
GCTGACATGTGGAGTTTTTGAATAACTGCCATTGAATTAGCAACAGGAGCAGCGCCTTATCACA  
AATATCCTCCCATGAAAGTGTTAATGTTGACTTTGCAAAATGATCCACCCACTTTGGAAACAGG  
GGTAGAGGATAAAGAAATGATGAAAAAGTACGGCAAGTCCTTTAGAAAATTACTTTCAGTGTG  
TCTTCAGAAAGATCCTTCCAAAAGGCCACAGCAGCAGAACTTTTAAAATGCAAATCTTCCAG  
AAAGCCAAGAACAGAGAGTACCTGATTGAGAAGCTGCTTACAAGAACACCAGACATAGCCCA  
AAGAGCCAAAAAGGTAAGAAGAGTTCCTGGGTCAAGTGGTCACCTTCATAAAACCGAAGACG  
GGGACTGGGAGTGGAGTGACGACGAGATGGATGAGAAGAGCGAAGAAGGGAAAGCAGCTTTT  
TCTCAGGAAAAGTCACGAAGAGTAAAAGAAGAAAATCCAGAGATTGCAGTGAGTGCCAGCAC  
CATCCCCGAACAAATACAGTCCCTCTCTGTGCACGACTCTCAGGGCCCAACCAATGCTAATGAA  
GACTACAGAGAAGCTTCTTCTGTGCCGTGAACCTCGTTTTGAGATTAAGAACTCCAGAAAGG  
AACTTAATGACATACGATTTGAGTTTACTCCAGGAAGAGATACAGCAGATGGTGTATCTCAGGA  
GCTCTTCTCTGCTGGCTTGGTGGATGGTCACGATGTAGTTATAGTGGCTGCTAATTTACAGAAGA  
TTGTAGATGATCCCAAAGCTTTAAAAACATTGACATTTAAGTTGGCTTCTGGCTGTGATGGGTCG  
GAGATTCTGATGAAGTGAAGCTGATTGGGTTTGCTCAGTTGAGTGTGAGCCCGGTCGCCACCA  
T     G     G     T     G     A     G     C     A     A     G     G     G
